# Supplementary material for: Synthesis and Application of a Novel Metal–Organic Frameworks-Based Ion-Imprinted Polymer for Effective Removal of Co(II) from Simulated Radioactive Wastewater
Source: MDPI journal article supplement (doi:10.3390/polym15092150), 2023-04-30
Supplement: s1 [file s1]

*Supporting Information for*

# **Synthesis and Application of a Novel MOFs-Based Ion-Imprinted Polymer for Effective Removal of Co(II) from Simulated Radioactive Wastewater**

Li Yu <sup>1</sup>, Tu Lan <sup>2</sup>, Guoyuan Yuan <sup>1,\*</sup>, Chongxiong Duan <sup>3</sup>, Xiaoqin Pu <sup>1</sup> and Ning Liu <sup>2,\*</sup>

<sup>1</sup> College of Chemistry and Chemical Engineering, Chongqing University of Science and Technology, Chongqing 401331, China

<sup>2</sup> Key Laboratory of Radiation Physics and Technology of the Ministry of Education, Institute of Nuclear Science and Technology, Sichuan University, Chengdu 610064, China

<sup>3</sup> School of Materials Science and Energy Engineering, Foshan University, Foshan 528231, China

\* Correspondence: hdyzdt@126.com (G.Y.); nliu720@scu.edu.cn (N.L.)

## **Table of Contents**

Section S1. Details of DFT Calculations

Section S2. N<sub>2</sub> Sorption-Desorption Isotherms

Section S3. EDS Spectra

Section S4. Zeta Potentials

Section S5. Sorption Kinetics

Section S6. Sorption Thermodynamics

Section S7. Sorption Isotherms

Section S8. Selectivity and Reusability

Section S9. Bond Length and WBIs from DFT Calculations

## Section S1. Details of DFT Calculations

Density functional theory (DFT) methods were employed to probe the interaction between Co(II) and MIIP. In this work, the hybrid B3LYP functional,<sup>1</sup> as implemented in Gaussian 09 package,<sup>2</sup> was used to perform the DFT calculations, together with Grimme's D3 correction with Becke-Johnson damping function.<sup>3</sup> The cobalt atom was described using Stuttgart fully relativistic effective core potentials (RECPs) and the associated optimized basis sets.<sup>4</sup> The small-core RECPs replaced 10 core electrons in cobalt while the corresponding valence basis set represented the remaining 17 electrons. The nonmetallic atoms including H, C, N, and O were treated using two combined basis sets: one with the 6-31+G(d) basis set for geometry optimization and frequency calculations, and another one with the larger basis set 6-311++G(d,p) to refine energies.<sup>5</sup> Frequency calculations were performed on all optimized stationary points to identify the nature as minima and provide thermodynamic quantities, such as energy ( $E$ ) and Gibbs free energy ( $G$ ). The solvent effect of water was taken into account using the polarizable continuum model (PCM).<sup>6</sup> The Wiberg bond indices (WBIs) were obtained using natural bond orbital (NBO) analysis.<sup>7</sup>

## Section S2. N<sub>2</sub> Sorption-Desorption Isotherms

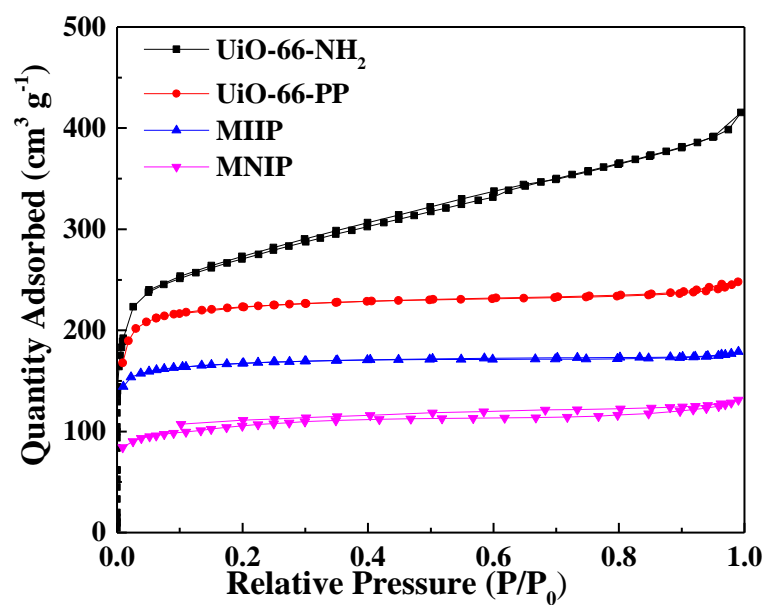

**Figure S1.** N<sub>2</sub> sorption-desorption isotherms of UiO-66-NH<sub>2</sub>, MIIP, and MNIP.

Section S3. EDS Spectra

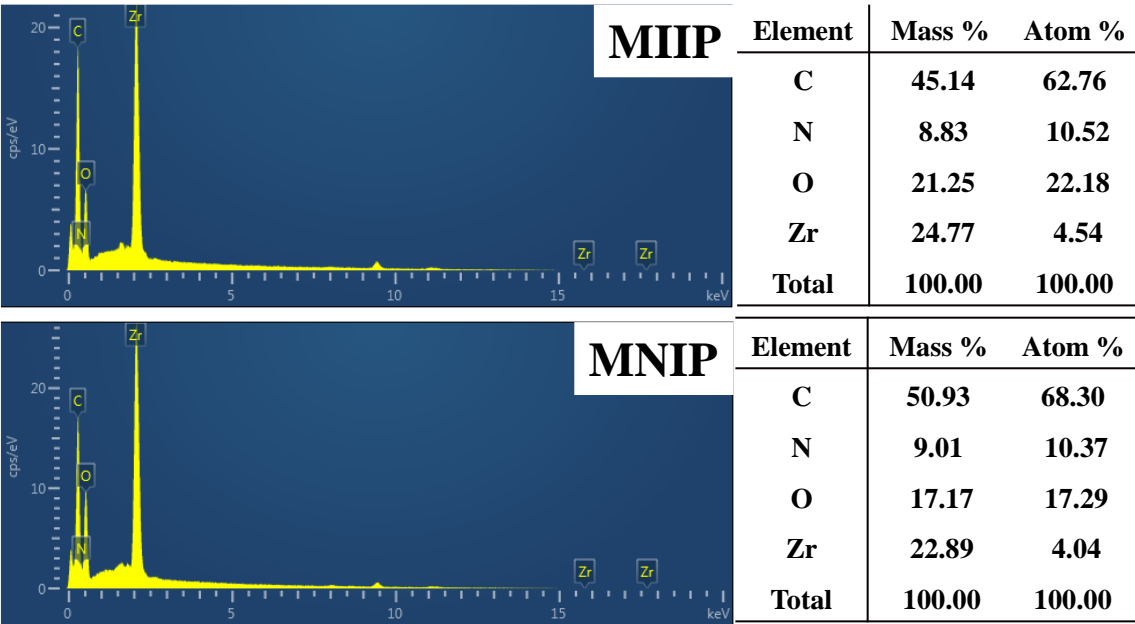

Figure S2. EDS spectra of MIIP and MNIP.

## Section S4. Zeta Potentials

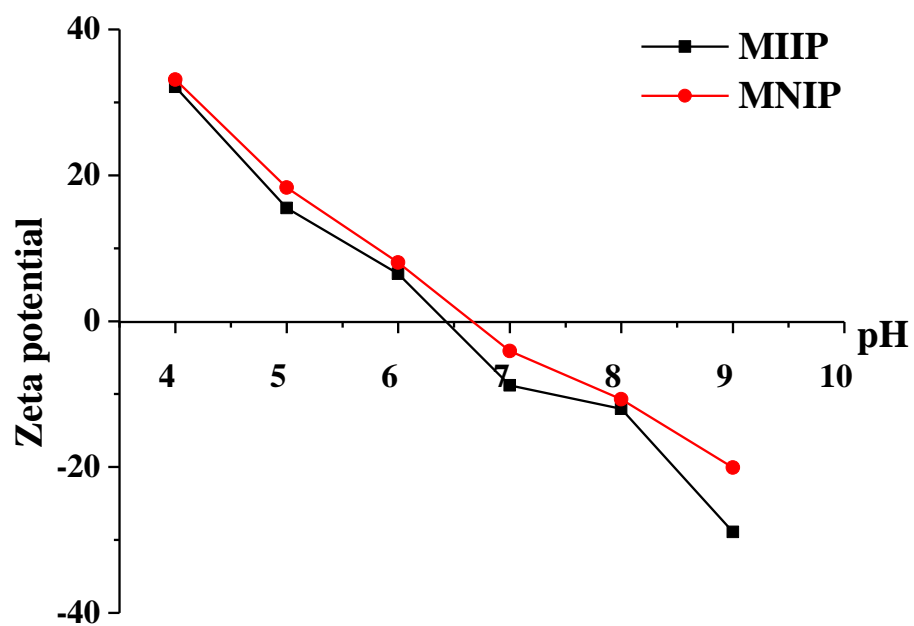

**Figure S3.** Zeta potentials of MIIP and MNIP as a function of pH.

## Section S5. Sorption Kinetics

The pseudo-first-order (Equation S1), the pseudo-second-order (Equation S2), and the intra-particle diffusion model (Equation S3) are shown below.<sup>8</sup>

$$\ln(q_e - q_t) = \ln q_e - k_1 t \quad (\text{S1})$$

$$\frac{t}{q_t} = \frac{1}{k_2 q_e^2} + \frac{t}{q_e} \quad (\text{S2})$$

$$q_t = k_{int} t^{0.5} + C \quad (\text{S3})$$

where  $q_e$  ( $\text{mg}\cdot\text{g}^{-1}$ ) and  $q_t$  ( $\text{mg}\cdot\text{g}^{-1}$ ) are the amounts of metal ions adsorbed at equilibrium and at time  $t$  (min), respectively.  $k_1$  ( $\text{min}^{-1}$ ),  $k_2$  ( $\text{g}\cdot\text{mg}^{-1}\cdot\text{min}^{-1}$ ), and  $k_{int}$  are the kinetic rate constants for pseudo-first-order, second-order models, and intra-particle diffusion rate constants, respectively.  $C$  ( $\text{mg}\cdot\text{g}^{-1}$ ) is the constant proportional to the boundary layer thickness.

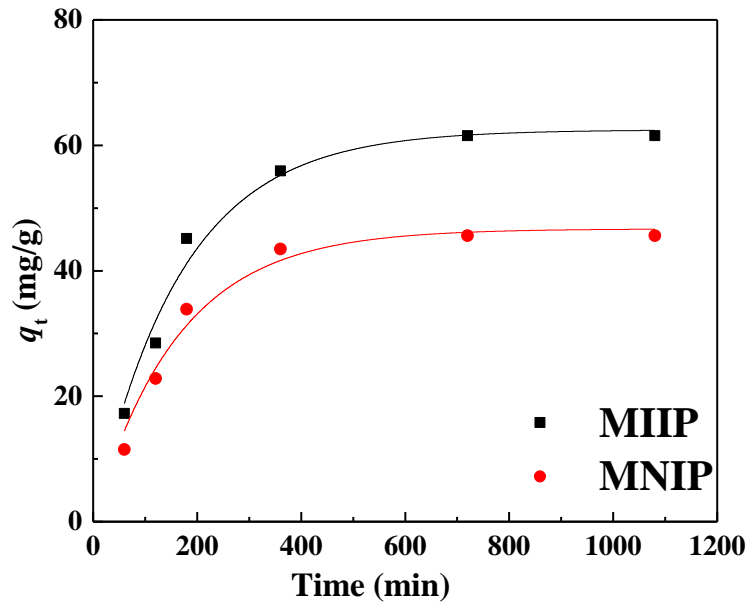

Figure S4. The pseudo-first-order kinetic model fitted curves.

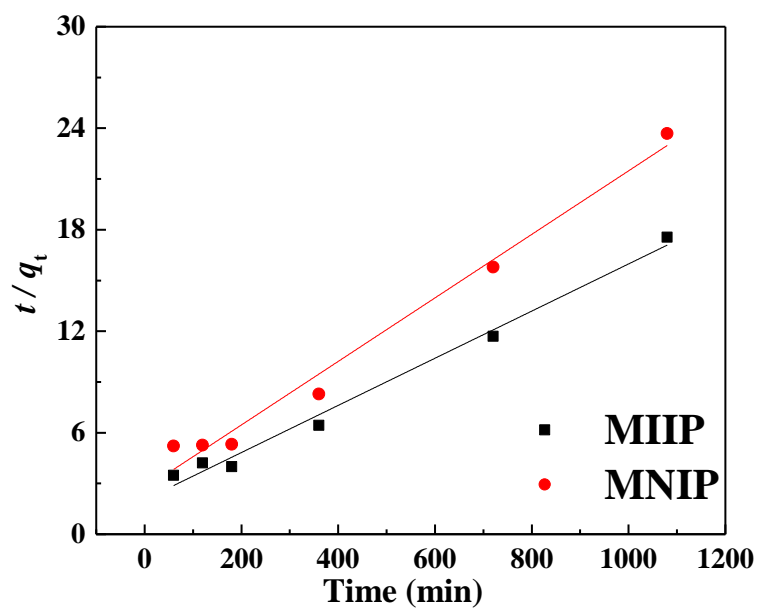

Figure S5. The pseudo-second-order kinetic model fitted curves.

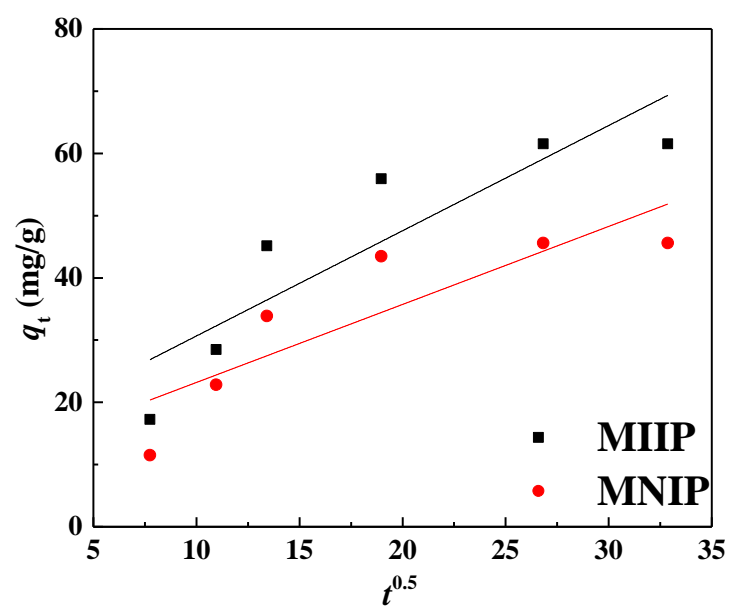

Figure S6. The intra-particle diffusion model fitted curves.



## Section S6. Sorption Thermodynamics

The thermodynamic parameters including the changes of enthalpy ( $\Delta H^0$ ), entropy ( $\Delta S^0$ ), and Gibbs free energy ( $\Delta G^0$ ) were calculated using the following equations.

$$\ln K_d = \frac{\Delta S^0}{R} - \frac{\Delta H^0}{RT} \quad (S4)$$

$$\Delta G^0 = \Delta H^0 - T\Delta S^0 \quad (S5)$$

where  $T$  (K) is the absolute temperature and  $R$  ( $8.314 \text{ J}\cdot\text{mol}^{-1}\cdot\text{K}^{-1}$ ) is the ideal gas constant. The values of  $\Delta H^0$  (standard enthalpy change) and  $\Delta S^0$  (standard entropy change) were calculated from the slope and intercept of the linear regression of  $\ln K_d$  vs  $1/T$ .

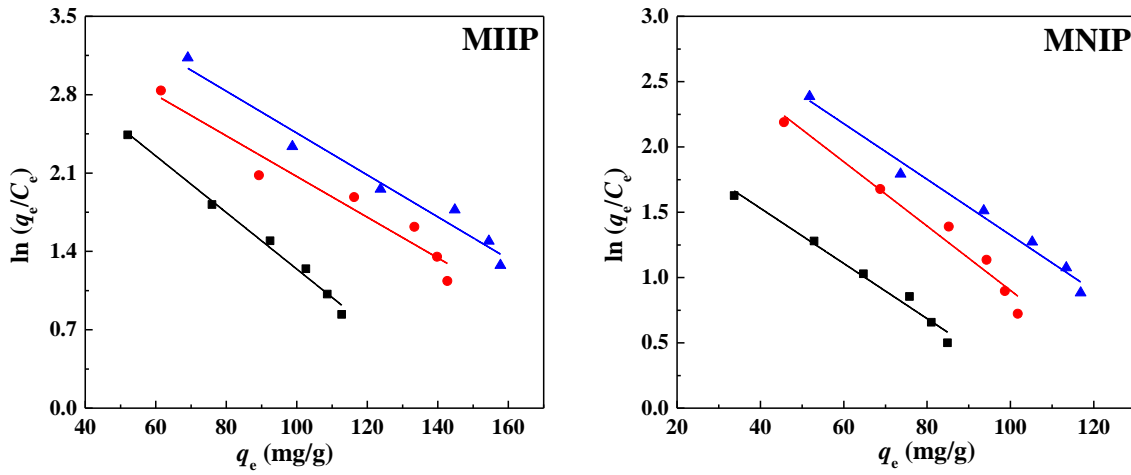

Figure S7. Relationship curves between  $\ln K_d$  and  $1000/T$ .

## Section S7. Sorption Isotherms

The Langmuir model (Equation S6) and Freundlich model (Equation S7) can be described as follows.

$$\frac{c_e}{q_e} = \frac{c_e}{q_m} + \frac{1}{q_m K_L} \quad (\text{S6})$$

$$\ln q_e = \ln K_F + \frac{1}{n} \ln c_e \quad (\text{S7})$$

where  $q_m$  ( $\text{mg}\cdot\text{g}^{-1}$ ) is the maximum sorption capacity, and  $K_L$  ( $\text{L}\cdot\text{mg}^{-1}$ ) is the Langmuir sorption equilibrium constant.  $c_e$  ( $\text{mg}\cdot\text{L}^{-1}$ ) and  $q_e$  ( $\text{mg}\cdot\text{g}^{-1}$ ) are the concentration of the adsorbate in the equilibrated solution and the amount of the adsorbate adsorbed on the sorbent, respectively.  $K_F$  ( $\text{mg}\cdot\text{g}^{-1}(\text{L}\cdot\text{mg})^{1/n}$ ) is the Freundlich constant that indicates the sorption capacity, and  $n$  is an empirical parameter related to the intensity of sorption.

## Section S8. Selectivity and Reusability

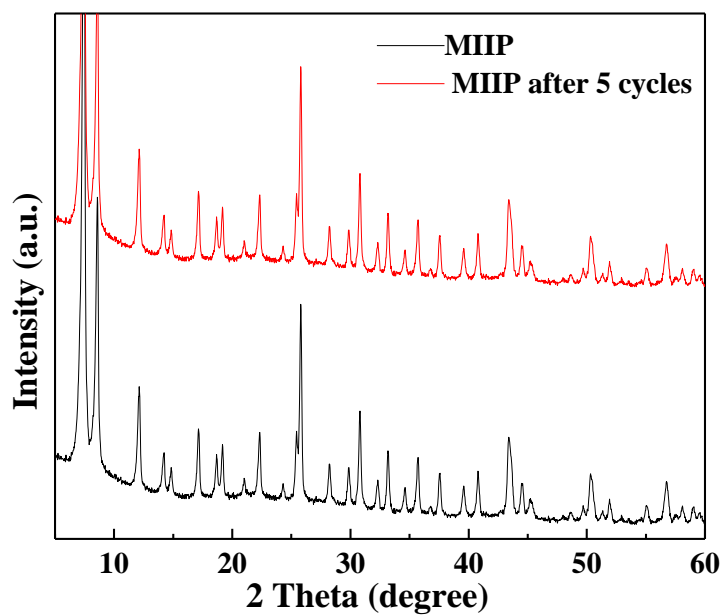

**Figure S8.** XRD of MIIP after 5 cycles.

**Table S1.** The N<sub>2</sub> sorption-desorption data of UiO-66-NH<sub>2</sub>, MIIP, and MNIP.

| Samples             | Surface area (m <sup>2</sup> ·g <sup>-1</sup> ) | Pore diameter (nm) | Pore volume (cc·g <sup>-1</sup> ) |
|---------------------|-------------------------------------------------|--------------------|-----------------------------------|
| MIIP                | 672.8                                           | 3.7                | 0.28                              |
| MIIP after 5 cycles | 660.2                                           | 3.7                | 0.28                              |

## Section S9. Bond Length and WBIs from DFT Calculations

**Table S2.** Bond length (R, Å) and Wiberg bond indices (WBIs) of Co–O<sub>w</sub> and Co–N<sub>VP</sub> bonds in the Co(II)–VP complexes. The O<sub>w</sub> represents the oxygen atoms of water and N<sub>VP</sub> represents the nitrogen atoms of the ligand VP. The averaged value is in blue.

| Species                                                           | Co–O <sub>w</sub> |              | Co–N <sub>VP</sub> |              |
|-------------------------------------------------------------------|-------------------|--------------|--------------------|--------------|
|                                                                   | R (Å)             | WBIs         | R (Å)              | WBIs         |
| Co(H <sub>2</sub> O) <sub>6</sub> <sup>2+</sup>                   | 2.113             | 0.080        |                    |              |
|                                                                   | 2.115             | 0.079        |                    |              |
|                                                                   | 2.115             | 0.079        |                    |              |
|                                                                   | 2.113             | 0.080        |                    |              |
|                                                                   | 2.118             | 0.079        |                    |              |
|                                                                   | 2.118             | 0.079        |                    |              |
|                                                                   | <b>2.115</b>      | <b>0.079</b> |                    |              |
| CoVP(H <sub>2</sub> O) <sub>5</sub> <sup>2+</sup>                 | 2.123             | 0.080        | 2.208              | 0.111        |
|                                                                   | 2.121             | 0.081        |                    |              |
|                                                                   | 2.140             | 0.077        |                    |              |
|                                                                   | 2.137             | 0.078        |                    |              |
|                                                                   | 2.148             | 0.074        |                    |              |
|                                                                   | <b>2.134</b>      | <b>0.078</b> |                    |              |
| Co(VP) <sub>2</sub> (H <sub>2</sub> O) <sub>4</sub> <sup>2+</sup> | 2.159             | 0.076        | 2.116              | 0.103        |
|                                                                   | 2.151             | 0.078        | 2.116              | 0.103        |
|                                                                   | 2.151             | 0.078        | <b>2.116</b>       | <b>0.103</b> |
|                                                                   | 2.159             | 0.076        |                    |              |
|                                                                   | <b>2.155</b>      | <b>0.077</b> |                    |              |
| Co(VP) <sub>3</sub> (H <sub>2</sub> O) <sub>3</sub> <sup>2+</sup> | 2.205             | 0.072        | 2.139              | 0.100        |
|                                                                   | 2.194             | 0.072        | 2.124              | 0.103        |
|                                                                   | 2.155             | 0.080        | 2.112              | 0.108        |
|                                                                   | <b>2.185</b>      | <b>0.075</b> | <b>2.125</b>       | <b>0.104</b> |
| Co(VP) <sub>4</sub> (H <sub>2</sub> O) <sub>2</sub> <sup>2+</sup> | 2.114             | 0.088        | 2.202              | 0.097        |
|                                                                   | 2.114             | 0.088        | 2.202              | 0.097        |
|                                                                   | <b>2.114</b>      | <b>0.088</b> | 2.182              | 0.095        |
|                                                                   |                   |              | 2.182              | 0.095        |
|                                                                   |                   |              | <b>2.192</b>       | <b>0.096</b> |
| Co(VP) <sub>5</sub> H <sub>2</sub> O <sup>2+</sup>                | 2.240             | 0.067        | 2.207              | 0.092        |
|                                                                   |                   |              | 2.168              | 0.093        |
|                                                                   |                   |              | 2.173              | 0.095        |
|                                                                   |                   |              | 2.173              | 0.094        |
|                                                                   |                   |              | 2.176              | 0.098        |
|                                                                   |                   |              | <b>2.179</b>       | <b>0.094</b> |
| Co(VP) <sub>6</sub> <sup>2+</sup>                                 |                   |              | 2.239              | 0.082        |
|                                                                   |                   |              | 2.240              | 0.082        |
|                                                                   |                   |              | 2.234              | 0.082        |
|                                                                   |                   |              | 2.234              | 0.082        |
|                                                                   |                   |              | 2.234              | 0.082        |
|                                                                   |                   |              | 2.234              | 0.082        |
|                                                                   |                   |              | <b>2.236</b>       | <b>0.082</b> |

## References

- (1) Becke, A. D. Density-functional thermochemistry. III. The role of exact exchange. *J. Chem. Phys.* **1993**, *98*, 5648-5652.
- (2) Frisch, M. J.; Trucks, G. W.; Schlegel, H. B.; Scuseria, G. E.; Robb, M. A.; Cheeseman, J. R.; Scalmani, G.; Barone, V.; Mennucci, B.; Petersson, G. A.; Nakatsuji, H.; Caricato, M.; Li, X.; Hratchian, H. P.; Lzmaylov, A. F.; Bloino, J.; Zheng, G.; Sonnenberg, J. L.; Hada, M.; Ehara, M.; Toyota, K.; Fukuda, R.; Hasegawa, J.; Ishida, M.; Nakajima, T.; Honda, Y.; Kitao, O.; Nakai, H.; Vreven, T.; Montgomery, J. A., Jr.; Peralta, J. E.; Ogliaro, F.; Bearpark, M.; Heyd, J. J.; Brothers, E.; Kudin, K. N.; Staroverov, V. N.; Kobayashi, R.; Normand, J.; Raghavachari, K.; Rendell, A.; Burant, J. C.; Lyengar, S. S.; Tomasi, J.; Cossi, M.; Rega, N.; Millam, J. M.; Klene, M.; Knox, J. E.; Cross, J. B.; Bakken, V.; Adamo, C.; Jaramillo, J.; Gomperts, R.; Stratmann, R. E.; Yazyev, O.; Austin, A. J.; Cammi, R.; Pomelli, C.; Ochterski, J. W.; Martin, R. L.; Morokuma, K.; Zakrzewski, V. G.; Voth, G. A.; Salvador, P.; Dannenberg, J. J.; Dapprich, S.; Daniels, A. D.; Farkas, O.; Foresman, J. B.; Ortiz, J. V.; Cioslowski, J.; Fox, D. J. *Gaussian 09*, Gaussian, Inc.: Wallingford, CT, 2009.
- (3) Grimme, S.; Antony, J.; Ehrlich, S.; Krieg, H. A consistent and accurate ab initio parametrization of density functional dispersion correction (DFT-D) for the 94 elements H-Pu. *J. Chem. Phys.* **2010**, *132*, 154104.
- (4) Dolg, M.; Wedig, U.; Stoll, H.; Preuss, H. Energy-adjusted ab initio pseudopotentials for the first row transition elements. *J. Chem. Phys.* **1987**, *86*, 866-872.
- (5) Xia, M.; Yang, X.; Chai, Z.; Wang, D. Stronger hydration of Eu(III) impedes its competition against Am(III) in binding with N-donor extractants. *Inorg. Chem.* **2020**, *59*, 6267-6278.
- (6) Barone, V.; Cossi, M.; Tomasi, J. Geometry optimization of molecular structures in solution by the polarizable continuum model. *J. Comput. Chem.* **1998**, *19*, 404-417.
- (7) Reed, A. E.; Weinhold, F. Natural bond orbital analysis of near-Hartree-Fock water dimer. *J. Chem. Phys.* **1983**, *78*, 4066-4073.
- (8) Guo, W. L.; Chen, R.; Liu, Y.; Meng, M. J.; Meng, X. G.; Hu, Z. Y.; Song, Z. L. Preparation of ion-imprinted mesoporous silica SBA-15 functionalized with triglycine for selective adsorption of Co(II). *Colloid. Surface. A* **2013**, *436*, 693-703.
